# Supplementary material for: A genome-wide IR-induced RAD51 foci RNAi screen identifies CDC73 involved in chromatin remodeling for DNA repair
Source: PubMed Central journal article supplement (PMC4860774; doi:10.1038/celldisc.2015.34), 2015-12-01

Figure S4

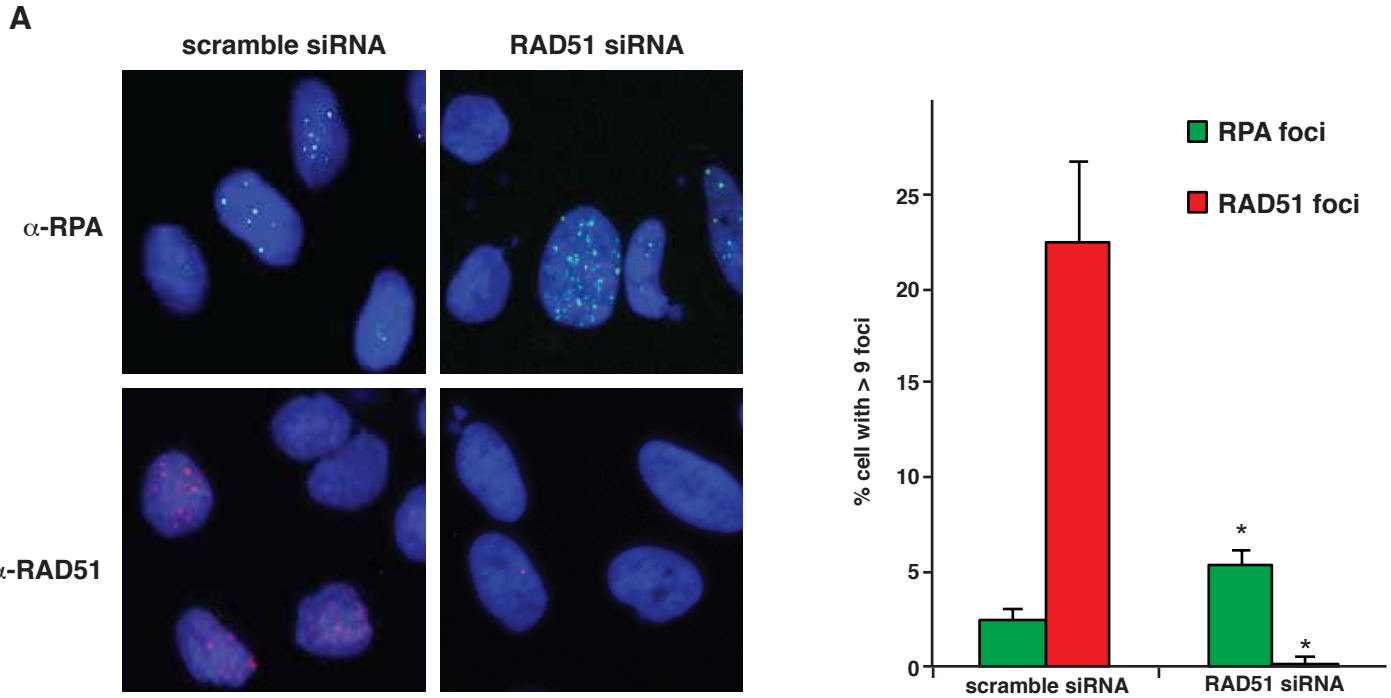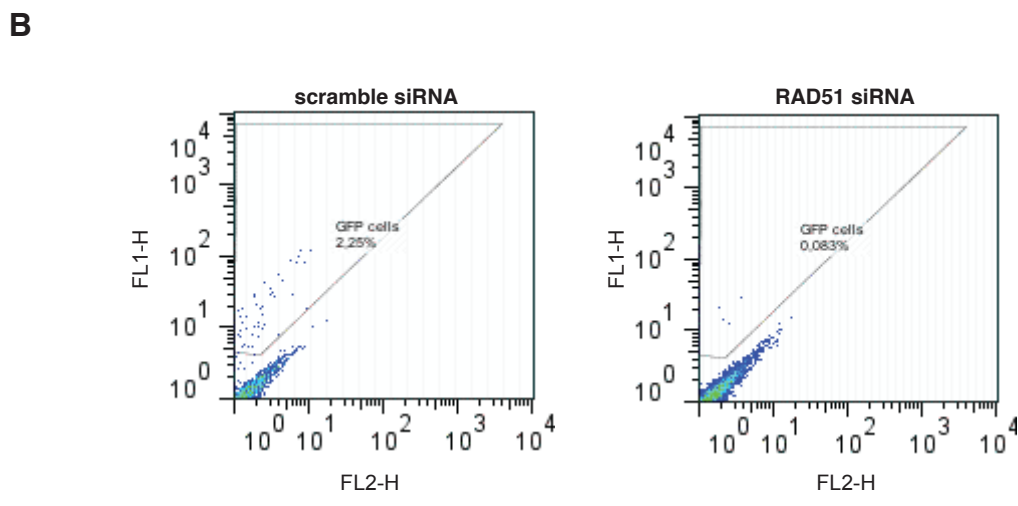

Supplement: celldisc201534-s12.pdf [file celldisc201534-s12.pdf]
